# Supplementary material for: Allosteric signalling in the outer membrane translocation domain of PapC usher
Source: eLife. 2014 Oct 1;3:e03532. doi: 10.7554/eLife.03532 (PMC4356140; doi:10.7554/eLife.03532)
Supplement: Supplementary file 1. — DOI: http://dx.doi.org/10.7554/eLife.03532.018 [file elife-03532-supp1.xlsx]

## Sheet: Sheet1
Mutation	Sequence of QuickChange forward primer (5’-3’)a	a The reverse primer is the reverse complement of the forward primer.
R237A	CAACTCAGATATATTCGCGTCATGGAGTTATACGGGAGCCAGC
D249A	GCCAGCCTGGAAAGCGCTGACCGGATGCTG
Y260A	CCCAGACTGCGAGGCGCTGCACCGCAGATTACC
V327A	GTCGATACGGCCTCGGCTCCTTATCTGACG
Y329A	GGCCTCGGTTCCTGCTCTGACGCGTCCGGG
T331A	GGTTCCTTATCTGGCGCGTCCGGGACAGG
R337A	CGCGTCCGGGACAGGTCGCGTACAAACTTGTCTCC
S363A	GACCGGAGAGGCAGCCTGGGGGCTCAG
S420A	CGTTTCAGGGAAAAGCCTGGCGTCTGAGCTACTCC
K427A	GGCGTCTGAGCTACTCCGCACGGTTTGATAATGCGG
T437A	GGATGCCGACATTGCGTTCGCCGGGTATCG
F438A	CGGATGCCGACATTACGGCCGCCGGGTATCGTTTC
R442A	CGACATTACGTTCGCCGGGTATGCTTTCTCAGAGCGAAAC
S444A	CGCCGGGTATCGTTTCGCAGAGCGAAACTATATGAC
